# Supplementary material
Source: PubMed Central journal article supplement (PMC3856240)
Supplement: NIHMS529455-supplement-01.pdf [file NIHMS529455-supplement-01.pdf]

## **Supplemental Information**

### **PARN mediates 3'-end trimming of Argonaute2-cleaved precursor microRNAs**

Mayuko Yoda, Daniel Cifuentes, Natsuko Izumi, Yuriko Sakaguchi, Tsutomu Suzuki,  
Antonio J. Giraldez and Yukihide Tomari

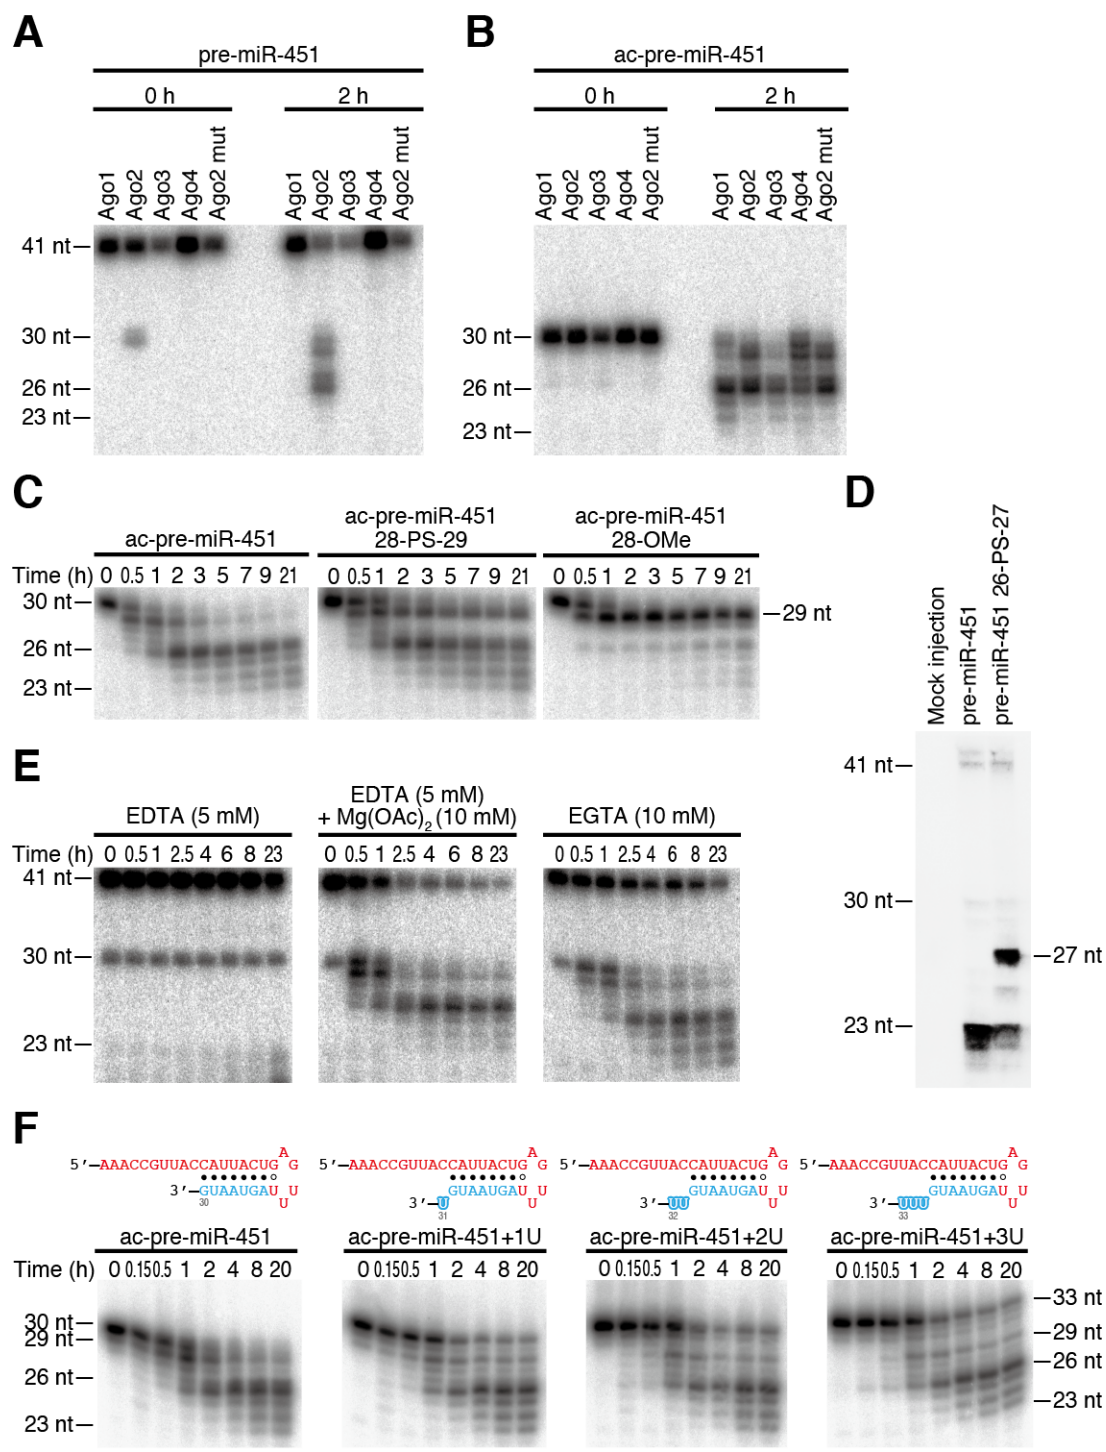

**Figure S1. Biochemical characterization of the trimming reaction, Related to Figure 1.**

(A) Cleavage of the pre-miR-451 3' arm is required for trimming in vitro. Pre-miR-451 was loaded into FLAG-tagged Ago1–4 or the catalytic mutant of Ago2 on beads and

trimmed in K562 lysate. Mature miR-451 was produced only with the catalytically active wild-type Ago2.

(B) Pre-nicked ac-pre-miR-451 can be matured regardless of the catalytic activity of Ago. Ac-pre-miR-451 was loaded into FLAG-tagged Ago1–4 or the catalytic mutant of Ago2 on beads and trimmed in K562 lysate. Mature miR-451 was produced even with catalytically inactive Ago proteins.

(C and D) The trimming enzyme is an exoribonuclease. Introduction of a phosphorotioate linkage or a 2'-*O*-methyl group specifically inhibited the trimming reaction at the corresponding positions in vitro (C) and in zebrafish embryos (D).

(E) The trimming enzyme is  $Mg^{2+}$ -dependent. Trimming was inhibited by EDTA and rescued by an excess amount of  $Mg^{2+}$ .

(F) Oligouridylation does not affect trimming. Ac-pre-miR-451 and its derivatives with additional 1–3 uridines at the 3' end were assayed for trimming in K562 lysate.

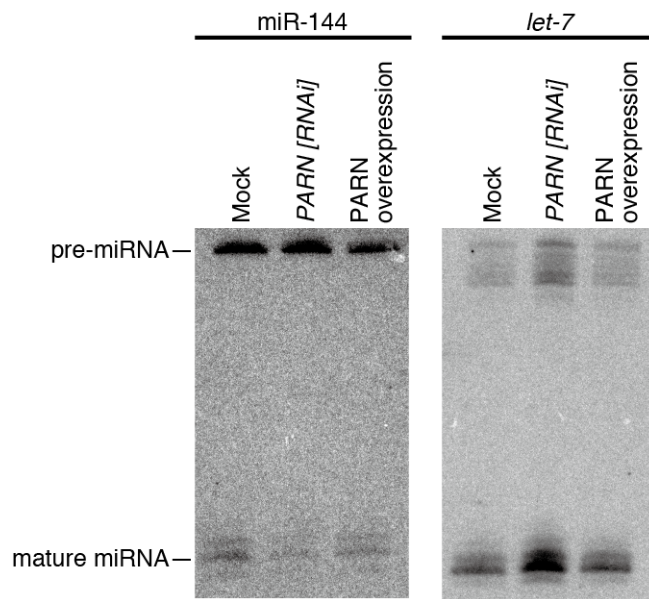

**Figure S2. Knockdown or overexpression of PARN does not affect the lengths of miR-144 and endogenous *let-7*, Related to Figure 2.**

Note that PARN knockdown markedly inhibited the cell growth and reduced the expression level of miR-144/miR-451, while having little impact on endogenous *let-7*. Importantly, unlike miR-451 (Figure 2D), the lengths (not the abundance) of miR-144 and *let-7* were not affected by knockdown and overexpression of PARN, highlighting the specific role of PARN in miR-451 maturation.

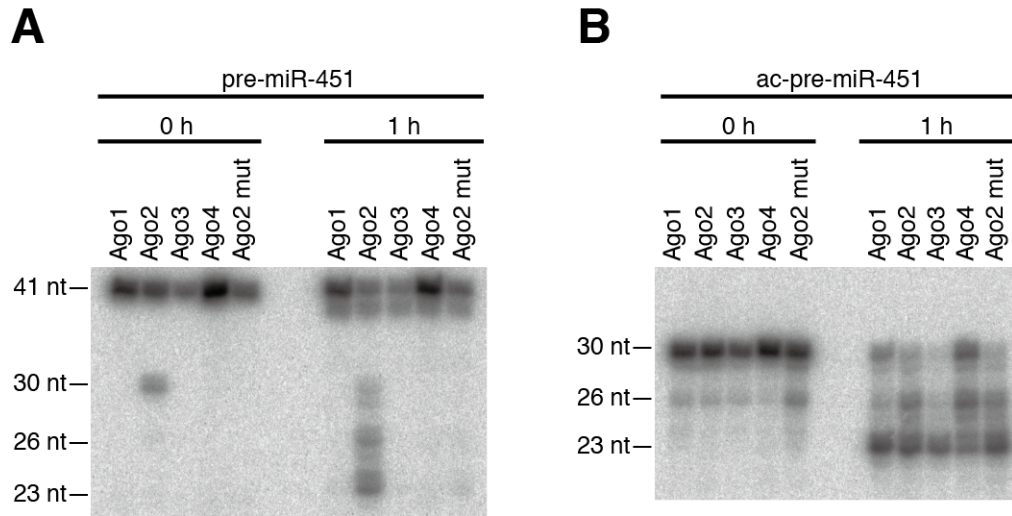

**Figure S3. Trimming by recombinant PARN, Related to Figure 3.**

(A) Pre-miR-451 was loaded into FLAG-tagged Ago1–4 or the catalytic mutant of Ago2 on beads and trimmed by recombinant PARN. Mature miR-451 was produced only with the catalytically active wild-type Ago2.

(B) Ac-pre-miR-451 was loaded into FLAG-tagged Ago1–4 or the catalytic mutant of Ago2 on beads and trimmed by recombinant PARN. Mature miR-451 was produced even with catalytically inactive Ago proteins.

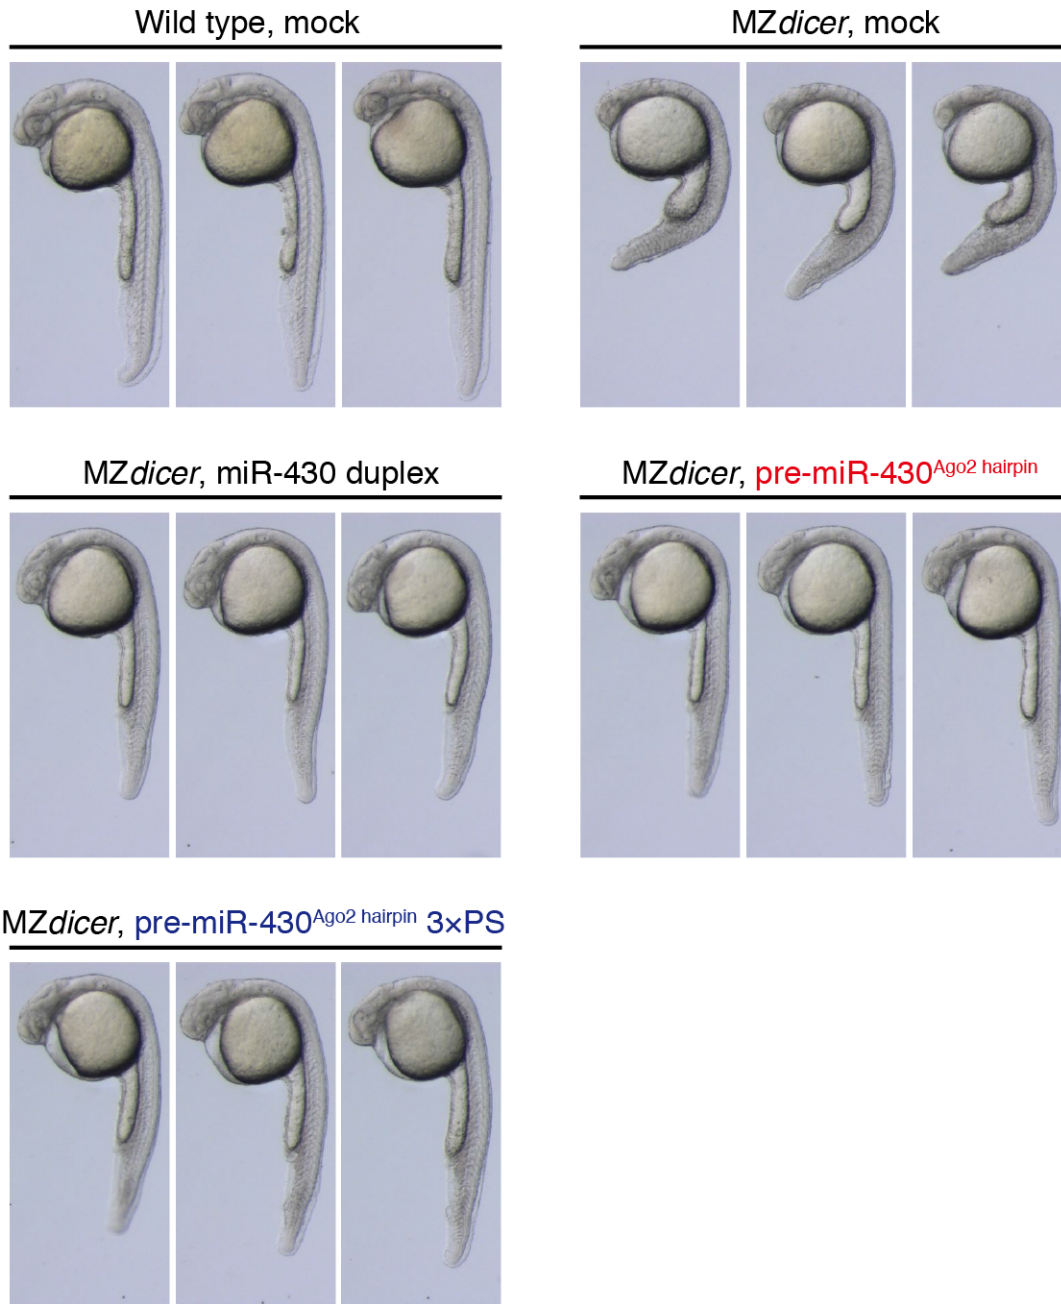

**Figure S4. Trimming is not essential to rescue the *MZdicer* phenotype, Related to Figure 5.**

Injection of miR-430 duplex, pre-miR-430<sup>Ago2 hairpin</sup> or pre-miR-430<sup>Ago2 hairpin</sup> 3×PS rescued the morphological defects of *MZdicer* mutant embryos. Three representative embryos for each condition are shown.

**Table S1. Summary of RNA sequencing, Related to Figure 6.**

| <b>Genotype</b> | <b>Injection</b>                            | <b>Total number of reads</b> | <b>Reads aligning by TopHat</b> | <b>Reads aligning to genes</b> |
|-----------------|---------------------------------------------|------------------------------|---------------------------------|--------------------------------|
| Wild type       | –                                           | 37,116,664                   | 31,990,244                      | 26,223,728                     |
| <i>MZdicer</i>  | –                                           | 21,187,083                   | 18,204,781                      | 14,840,805                     |
| <i>MZdicer</i>  | miR-430 duplex                              | 35,702,972                   | 30,873,614                      | 25,256,403                     |
| <i>MZdicer</i>  | pre-miR-430 <sup>Ago2</sup> hairpin         | 34,707,968                   | 29,534,030                      | 24,074,005                     |
| <i>MZdicer</i>  | pre-miR-430 <sup>Ago2</sup> hairpin<br>3×PS | 35,019,312                   | 30,101,667                      | 24,576,382                     |
